# Supplementary material for: Pre-clinical compartmental pharmacokinetic modeling of 2-[1-hexyloxyethyl]-2-devinyl pyropheophorbide-a (HPPH) as a photosensitizer in rat plasma by validated HPLC method
Source: Royal Society of Chemistry journal article supplement (doi:10.1039/c8pp00339d), 2018-12-20

1 **Pre-Clinical Compartmental Pharmacokinetic Modeling of 2-[1-hexyloxyethyl]-2-Devinyl**  
2 **Pyropheophorbide-a (HPPH) a Photosensitizer in Rat Plasma by Validated HPLC Method**

3 Kowthavarapu Venkata Krishna<sup>a</sup>, Ranendra Narayana Saha<sup>b</sup>, Anu Puri<sup>c</sup>, Mathias Viard<sup>d</sup>, Bruce  
4 A. Shapiro<sup>c</sup>, Sunil Kumar Dubey<sup>a\*</sup>

5 <sup>a</sup>*Department of Pharmacy, Birla Institute of Technology and Science, Pilani (BITS-PILANI),*  
6 *Pilani Campus, Rajasthan, INDIA*

7 <sup>b</sup>*Department of Biotechnology, Birla Institute of Technology and Science, Pilani (BITS-PILANI),*  
8 *Dubai Campus, Dubai - United Arab Emirates*

9 <sup>c</sup>*RNA Structure and Design Section, RNA Biology Laboratory (RBL), Center for Cancer*  
10 *Research, National Cancer Institute – Frederick, Frederick, MD, USA*

11 <sup>d</sup>*Basic Science Program, CIP, Frederick National Laboratory for Cancer Research sponsored by*  
12 *the National Cancer Institute, Frederick, MD, USA*

13

14 **Supplementary Data**

15 **Table S1:** Solid phase extraction method for HPPH

| Procedure      | Reagent         | Flow rate (μL/min) | Volume (μL) | n |
|----------------|-----------------|--------------------|-------------|---|
| Conditioning   | Methanol        | 4000               | 1000        | 2 |
| Equilibration  | Milli Q water   | 4000               | 1000        | 2 |
| Loading        | Sample          | 2000               | 600         | 1 |
| Cartridge wash | 1% Acetonitrile | 2000               | 1000        | 1 |
| Elution        | Acetonitrile    | 2000               | 1000        | 2 |

16 n, number of times

17 **Table S2:** Optimization of Solid-Phase Extraction (SPE) method for sample preparation

| Extracting technique                                                                                                                                                | Extracting solvent                                        | Sample volume (µL) | Volume of extraction solvent added (mL) | Vortex time (min) | Centrifugation [speed (rpm), time (min)] | % Recovery    | Remarks                                                                                                                                    |
|---------------------------------------------------------------------------------------------------------------------------------------------------------------------|-----------------------------------------------------------|--------------------|-----------------------------------------|-------------------|------------------------------------------|---------------|--------------------------------------------------------------------------------------------------------------------------------------------|
| Protein Precipitation (PP)                                                                                                                                          | Acetonitrile                                              | 200                | 3                                       | 5                 | 6000, 15                                 | 42-48%        | Poor recovery, interference of plasma was observed and inconsistent recovery                                                               |
| PP                                                                                                                                                                  | Methanol                                                  | 200                | 3                                       | 5                 | 6000, 15                                 | 35-39%        | Poor recovery, interference of plasma was observed and inconsistent recovery                                                               |
| Liquid-Liquid extraction (LLE)                                                                                                                                      | Methylene chloride (DCM)                                  | 200                | 3                                       | 5                 | 6000, 15                                 | 19-25 %       | Very poor recovery and high interference of plasma was observed                                                                            |
| LLE                                                                                                                                                                 | n-hexane                                                  | 200                | 3                                       | 5                 | 6000, 15                                 | 29-35 %       | Increase in the recovery of analyte was observed, but recovery was inconsistent and high plasma interference was observed                  |
| LLE                                                                                                                                                                 | n-hexane: IPA (97:3 v/v)                                  | 200                | 3                                       | 5                 | 6000, 15                                 | 35-39 %       | Slight increase in the recovery of analyte was observed, but recovery was inconsistent and high plasma interference was observed           |
| LLE                                                                                                                                                                 | n-hexane: IPA (95:5 v/v)                                  | 200                | 3                                       | 5                 | 6000, 15                                 | 37-41%        | Similar recovery of analyte was observed, but recovery was inconsistent and high plasma interference was observed                          |
| Solid-Phase extraction (SPE)                                                                                                                                        | Acetonitrile                                              | 200                | 2                                       | 2                 | --                                       | 59-64%        | No interference of plasma proteins was observed but recovery was reduced                                                                   |
| SPE                                                                                                                                                                 | Methanol                                                  | 200                | 2                                       | 2                 | --                                       | 51-55%        | Consistent recovery was observed, no interference of plasma proteins was observed                                                          |
| SPE                                                                                                                                                                 | Acetonitrile: 10 mM Ammonium formate (pH:4.2) (90:10 v/v) | 200                | 2                                       | 2                 | --                                       | 57-61%        | Slight decrease in the recovery of analyte was observed, no interference of plasma proteins was observed                                   |
| Based on the above results, SPE was selected as the extracting technique and acetonitrile as solvent of choice for elution and sample volume were further optimized |                                                           |                    |                                         |                   |                                          |               |                                                                                                                                            |
| SPE                                                                                                                                                                 | Acetonitrile                                              | 100                | 2                                       | 2                 | --                                       | 56-59%        | LLOQ was high (in µg/mL)                                                                                                                   |
|                                                                                                                                                                     |                                                           | 200                | 2                                       | 2                 | --                                       | 59-64%        | LLOQ was improved (in ng/mL)                                                                                                               |
|                                                                                                                                                                     |                                                           | 300                | 2                                       | 2                 | --                                       | <b>61-65%</b> | Consistent recovery and reproducible with no plasma interference, LOD was observed at 80 ng/mL, I.S. recovery was also good and consistent |

19 **Table S3:** Regression parameters of the calibration curve generated for each weighting factor ( $w_i$ ) and their  
 20 respective sum of the relative errors ( $\Sigma\%RE$ )

| <i>Model (<math>w_i</math>)</i> | <i>b</i> | <i>a</i>  | <i>r</i> <sup>2</sup> | $\Sigma\%RE$ |
|---------------------------------|----------|-----------|-----------------------|--------------|
| Unweighted                      | 0.000300 | -0.060000 | 0.999200              | 28.756462    |
| 1/var                           | 0.000296 | -0.041152 | 0.998916              | 9.022589     |
| 1/x <sup>2</sup>                | 0.000289 | -0.038070 | 0.999981              | 0.256647     |
| 1/x                             | 0.000297 | -0.045214 | 0.999523              | 1.125505     |
| 1/x <sup>1/2</sup>              | 0.000299 | -0.050980 | 0.999641              | 8.632172     |
| 1/y <sup>2</sup>                | 0.000283 | -0.035209 | 0.996163              | 7.020774     |
| 1/y                             | 0.000296 | -0.043203 | 0.999422              | 3.842983     |
| 1/y <sup>1/2</sup>              | 0.000298 | -0.049315 | 0.999637              | 6.818966     |

21 *b*, slope; *a*, constant; *r*<sup>2</sup>, regression co-efficient

22  
 23  
 24  
 25  
 26  
 27  
 28  
 29  
 30  
 31  
 32  
 33  
 34  
 35  
 36  
 37  
 38  
 39

40 Fig.S1 Schematic representation of a two-compartmental model

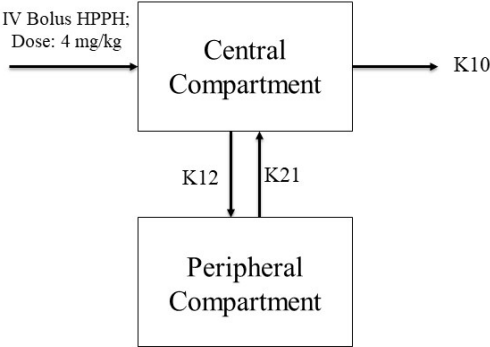

Supplement: c8pp00339d1.pdf [file c8pp00339d1.pdf]
